# Supplementary material
Source: PubMed Central journal article supplement (PMC5345556)
Supplement: JSLHR-59-1111-s001.pdf [file JSLHR-59-1111-s001.pdf]

## Materials for Online Supplement

**Supplemental Material S1.** Procedure for identifying best response constituents and response accuracy.

In order to identify best response constituent for monomorphemic names (e.g., Madonna), each response constituent was evaluated for phonological overlap with the target constituent. Among those that had at least .50 phonological overlap with the target constituent, the response constituent with the highest phonological overlap was selected as best. If no response constituent met the .50 threshold, phonological overlap for that trial was zero. We included a .50 threshold as the minimum standard of evidence that a response constituent was an attempt on the target constituent, and not coincidental phonological resemblance.

In the case of multi-morphemic names, phonological overlap was calculated independently for each target and response constituent, and target constituents were mapped to best response constituents based on highest overlap (using the  $\geq .50$  threshold to determine eligible response constituents). In very rare cases where more than one response constituent was considered best for a single target constituent or vice versa, we used additional phonological similarity features when they were obvious (e.g., shared onset, same sequence of shared phonemes; see Case 4 in Table 2) or chose the earliest response. Then, phonological overlap was calculated anew for the remaining target and response constituents. Next, we calculated phonological overlap for the whole name over the best response constituents and target constituents (note, because of the  $\geq .50$  threshold, sometimes the phonological overlap calculation for the whole name would involve fewer response constituents than target constituents). Trials with whole overlap  $\geq .75$  were deemed correct;  $< .75$  were scored as incorrect.
