# Supplementary material
Source: PubMed Central journal article supplement (PMC5345556)
Supplement: JSLHR-59-1111-s002.pdf [file JSLHR-59-1111-s002.pdf]

## Supplemental Material S2. Neuropsychological characteristics of study participants.

| Participant                     | Type | Picture naming (%) | Nonverbal comp (%) | Word comp (%) | Word rep (%) |
|---------------------------------|------|--------------------|--------------------|---------------|--------------|
| P1                              | TCM  | 77                 | 92                 | 94            | 95           |
| P2                              | A    | 83                 | 81                 | 95            | 95           |
| P3                              | A    | 78                 | 88                 | 98            | 94           |
| P4                              | A    | 64                 | 96                 | 92            | 87           |
| PWA group average               |      | 75                 | 89                 | 92.9          | 93.8         |
| Average (controls) <sup>a</sup> |      | 97                 | 98                 | 99            | 100          |

*Note.* Type = aphasia type, where A = anomic, TCM = transcortical motor; picture naming = oral picture naming in percentages (Philadelphia Naming Test; Roach, Schwartz, Martin, Grewal, & Brecher, 1996); nonverbal comp = a picture–picture association test for nonverbal comprehension, in percentages (Howard & Patterson, 1992); word comp = spoken word to picture matching test of comprehension in percentages (Mirman et al., 2010); word rep = a test of immediate word repetition, in percentages (Mirman et al., 2010); PWA = people with aphasia.

<sup>a</sup>Average performance for neurotypical control sample.

## References

- Howard, D., & Patterson, K. (1992). *Pyramids and palm trees: A test of semantic access from pictures and words*. Bury St. Edmunds, Suffolk, UK: Thames Valley Test Company.
- Mirman, D., Strauss, T. J., Brecher, A., Walker, G. M., Sobel, P., Dell, G. S., & Schwartz, M. F. (2010). A large, searchable, web-based database of aphasic performance on picture naming and other tests of cognitive functions. *Cognitive Neuropsychology*, *27*, 495–504.
- Roach, A., Schwartz, M. F., Martin, N., Grewal, R. S., & Brecher, A. (1996). The Philadelphia Naming Test: Scoring and rationale. *Clinical Aphasiology*, *24*, 121–133.
