# Supplementary material
Source: PubMed Central journal article supplement (PMC5345556)
Supplement: JSLHR-59-1111-s003.pdf [file JSLHR-59-1111-s003.pdf]

**Supplemental Material S3.** Coding examples demonstrating how best response constituent and response accuracy were determined.

| Case | Target (TCs in IPA)                   | Full Response                 | TC → RC (Overlap <sup>a</sup> )                                                                                                   | TC → BRC                              | Overlap <sup>b</sup> | Accuracy  |
|------|---------------------------------------|-------------------------------|-----------------------------------------------------------------------------------------------------------------------------------|---------------------------------------|----------------------|-----------|
| 1    | Titanic (tʰaɪtænək)                   | /tʰaɪkænək/                   | tʰaɪtænək → tʰaɪkænək (.86)                                                                                                       | tʰaɪtænək → tʰaɪkænək                 | .86                  | Correct   |
| 2    | Lily Tomlin<br>(lɪli tʰɑmlən)         | /tʰɑmlən, lɪli<br>tʰɑmlənsən/ | lɪli → tʰɑmlən (.20)<br>→ lɪli (1.00)<br>→ tʰɑmlənsən (.15)<br><br>tʰɑmlən → tʰɑmlən (1.00)<br>→ lɪli (.20)<br>→ tʰɑmlənsən (.80) | lɪli → lɪli<br>tʰɑmlən → tʰɑmlən      | 1.00                 | Correct   |
| 3    | Barack Obama<br>(bərək obɑmə)         | /mʌm bʌmɑmə/                  | bərək → mʌm (0)<br>→ bʌmɑmə (.55)<br><br>obɑmə → mʌm (.25)<br>→ bʌmɑmə (.73)                                                      | bərək → [none]<br>obɑmə → bʌmɑmə      | .50                  | Incorrect |
| 4    | Judy Dench<br>(dʒʊdi dəntʃ)           | /dʒʊzən dʊtʃ/                 | dʒʊdi → dʒʊzən (.44)<br>→ dʊtʃ (.57)<br><br>dəntʃ → dʒʊzən (.22)<br>→ dʊtʃ (.57)                                                  | dʒʊdi → [none]<br>dəntʃ → dʊtʃ        | .55                  | Incorrect |
| 5    | Donovan McNabb<br>(dənəvən<br>məknæb) | /məmnæb, dənəmænd<br>məknæb/  | dənəvən → məmnæb (.31)<br>→ dənəmænd (.80)<br>→ məknæb (.31)<br><br>məknæb → məmnæb (.83)<br>→ dənəmænd (.43)<br>→ məknæb (1.00)  | dənəvən → dənəmænd<br>məknæb → məknæb | .88                  | Correct   |

*Note.* TC = target constituent; IPA = International Phonetic Alphabet; RC = response constituent; BRC = best response constituent.

<sup>a</sup>Phonological overlap for each response constituent and target constituents. <sup>b</sup>Phonological overlap for all selected best response constituents and the target constituents.
