# Supplementary material
Source: PubMed Central journal article supplement (PMC5345556)
Supplement: JSLHR-59-1111-s004.pdf [file JSLHR-59-1111-s004.pdf]

**Supplemental Material S4.** Mean item characteristics per condition, across individual participants' stimuli sets.

|                 |                | <b>Response accuracy<sup>†</sup></b> | <b># syllables</b> | <b># phonemes</b> | <b>Person recognition</b> | <b>Name familiarity</b> |
|-----------------|----------------|--------------------------------------|--------------------|-------------------|---------------------------|-------------------------|
| <b>Training</b> | <b>Spacing</b> | <i>M (SD)</i>                        | <i>M (SD)</i>      | <i>M (SD)</i>     | <i>M (SD)</i>             | <i>M (SD)</i>           |
| Naming          | Lag 1          | .13 (0.13)                           | 3.71 (0.05)        | 9.92 (0.30)       | 1.09 (0.05)               | 1.13 (0.13)             |
|                 | Lag 5          | .14 (0.11)                           | 3.75 (0.12)        | 9.92 (0.14)       | 1.06 (0.05)               | 1.10 (0.08)             |
|                 | Lag 15         | .16 (0.11)                           | 3.68 (0.09)        | 9.82 (0.09)       | 1.07 (0.05)               | 1.10 (0.11)             |
|                 | Lag 30         | .13 (0.14)                           | 3.70 (0.06)        | 9.91 (0.25)       | 1.08 (0.07)               | 1.12 (0.11)             |
| Repetition      | Lag 1          | .13 (0.09)                           | 3.63 (0.24)        | 9.72 (0.29)       | 1.05 (0.04)               | 1.11 (0.13)             |
|                 | Lag 5          | .12 (0.07)                           | 3.71 (0.07)        | 9.86 (0.22)       | 1.05 (0.04)               | 1.10 (0.13)             |
|                 | Lag 15         | .13 (0.14)                           | 3.74 (0.08)        | 9.88 (0.27)       | 1.09 (0.06)               | 1.13 (0.13)             |
|                 | Lag 30         | .15 (0.10)                           | 3.75 (0.15)        | 9.81 (0.23)       | 1.11 (0.08)               | 1.14 (0.16)             |

*Note.* <sup>†</sup>Average response accuracy from the item-selection phase.
