# Supplementary material
Source: PubMed Central journal article supplement (PMC5345556)
Supplement: JSLHR-59-1111-s005.pdf [file JSLHR-59-1111-s005.pdf]

**Supplemental Material S5.** Mean (standard error) response accuracy at training, retention test, and follow-up test by condition.

| <b>Training condition</b> | <b>Spacing</b> | <b>Lag</b> | <b>Training<sup>†</sup></b> | <b>Retention test</b> | <b>Follow-up test</b> |
|---------------------------|----------------|------------|-----------------------------|-----------------------|-----------------------|
|                           |                |            | <b><i>M (SE)</i></b>        | <b><i>M (SE)</i></b>  | <b><i>M (SE)</i></b>  |
| Naming                    | Massed         | 1          | .83 (0.07)                  | .36 (0.10)            | .33 (0.08)            |
|                           | Spaced         | 5          | .84 (0.10)                  | .51 (0.14)            | .40 (0.11)            |
|                           | Spaced         | 15         | .79 (0.11)                  | .55 (0.13)            | .42 (0.09)            |
|                           | Spaced         | 30         | .67 (0.13)                  | .53 (0.12)            | .43 (0.11)            |
| Repetition                | Massed         | 1          | .98 (0.01)                  | .33 (0.08)            | .27 (0.07)            |
|                           | Spaced         | 5          | .97 (0.01)                  | .36 (0.08)            | .30 (0.07)            |
|                           | Spaced         | 15         | .96 (0.02)                  | .45 (0.11)            | .36 (0.09)            |
|                           | Spaced         | 30         | .93 (0.04)                  | .44 (0.11)            | .37 (0.08)            |

*Note.* <sup>†</sup>Average accuracy of the final training trial per item.
