# Supplementary material
Source: PubMed Central journal article supplement (PMC5345556)
Supplement: JSLHR-59-1111-s006.pdf [file JSLHR-59-1111-s006.pdf]

**Supplemental Material S6.** Mean response accuracy per participant as a function of condition at training, retention test, and follow-up.

| Participant | Training Condition | Spacing | Lag | Training <sup>†</sup> | Retention test | Follow-up test |
|-------------|--------------------|---------|-----|-----------------------|----------------|----------------|
|             |                    |         |     | <i>M</i>              | <i>M</i>       | <i>M</i>       |
| P1          | Naming             | Massed  | 1   | .65                   | .17            | .17            |
|             |                    | Spaced  | 5   | .53                   | .17            | .22            |
|             |                    | Spaced  | 15  | .49                   | .21            | .22            |
|             |                    | Spaced  | 30  | .34                   | .19            | .13            |
|             | Repetition         | Massed  | 1   | .96                   | .13            | .14            |
|             |                    | Spaced  | 5   | .94                   | .17            | .14            |
|             |                    | Spaced  | 15  | .89                   | .18            | .15            |
|             |                    | Spaced  | 30  | .86                   | .14            | .18            |
| P2          | Naming             | Massed  | 1   | .86                   | .61            | .53            |
|             |                    | Spaced  | 5   | .97                   | .78            | .69            |
|             |                    | Spaced  | 15  | .97                   | .81            | .64            |
|             |                    | Spaced  | 30  | .97                   | .75            | .67            |
|             | Repetition         | Massed  | 1   | .97                   | .53            | .47            |
|             |                    | Spaced  | 5   | .97                   | .50            | .44            |
|             |                    | Spaced  | 15  | .87                   | .72            | .58            |
|             |                    | Spaced  | 30  | .86                   | .53            | .53            |
| P3          | Naming             | Massed  | 1   | .82                   | .40            | .40            |
|             |                    | Spaced  | 5   | .89                   | .69            | .40            |
|             |                    | Spaced  | 15  | .84                   | .67            | .49            |
|             |                    | Spaced  | 30  | .67                   | .62            | .51            |
|             | Repetition         | Massed  | 1   | .98                   | .31            | .27            |
|             |                    | Spaced  | 5   | .98                   | .50            | .37            |
|             |                    | Spaced  | 15  | 1.00                  | .42            | .36            |
|             |                    | Spaced  | 30  | 1.00                  | .67            | .49            |
| P4          | Naming             | Massed  | 1   | 1.00                  | .24            | .22            |
|             |                    | Spaced  | 5   | .96                   | .40            | .27            |
|             |                    | Spaced  | 15  | .87                   | .51            | .31            |
|             |                    | Spaced  | 30  | .71                   | .53            | .40            |
|             | Repetition         | Massed  | 1   | 1.00                  | .36            | .20            |
|             |                    | Spaced  | 5   | 1.00                  | .29            | .24            |
|             |                    | Spaced  | 15  | .98                   | .49            | .33            |
|             |                    | Spaced  | 30  | .98                   | .44            | .29            |

Note. <sup>†</sup> Average accuracy of the final training trial per item.
